# Supplementary material for: Sorangicin A Is Active against Chlamydia in Cell Culture, Explanted Fallopian Tubes, and Topical In Vivo Treatment
Source: MDPI journal article supplement (doi:10.3390/antibiotics12050795), 2023-04-22
Supplement: s1 [file s1]

## Article

# Sorangicin A Is Active Against *Chlamydia* in Cell Culture and Vaginal Topical Antibiotic Treatment in Mice

Simon Grasseuntner <sup>1,2,†</sup>, Katharina Koethke <sup>1,†</sup>, Celeste Scholz <sup>1</sup>, Lea Semmler <sup>1</sup>, Mariia Lupatsii <sup>1</sup>, Laura Kirchhoff <sup>1</sup>, Jennifer Herrmann <sup>3,4</sup>, Katharina Rox <sup>4,5</sup>, Kathrin Wittstein <sup>4,6</sup>, Nadja Käding <sup>1,2</sup>, Lars C. Hanker <sup>7</sup>, Marc Stadler <sup>4,6</sup>, Mark Brönstrup <sup>4,5</sup>, Rolf Müller <sup>3,4</sup>, Kensuke Shima <sup>1</sup> and Jan Rupp <sup>1,2,\*</sup>

<sup>1</sup> Department of Infectious Diseases and Microbiology, University of Luebeck, 23538 Luebeck, Germany; simon.grasseuntner@uksh.de (S.G.)

<sup>2</sup> German Center for Infection Research (DZIF), Partner Site Hamburg-Lübeck-Borstel-Riems, 23538 Lübeck, Germany

<sup>3</sup> Helmholtz Centre for Infection Research (HZI), Helmholtz Institute for Pharmaceutical Research Saarland (HIPS), and Department of Pharmacy, Saarland University, 66123 Saarbrücken, Germany

<sup>4</sup> German Center for Infection Research (DZIF), Partner Site Hannover-Braunschweig, 38124 Braunschweig, Germany

<sup>5</sup> Department of Chemical Biology, Helmholtz Centre for Infection Research, 38124 Braunschweig, Germany

<sup>6</sup> Department of Microbial Drugs, Helmholtz Centre for Infection Research, 38124 Braunschweig, Germany

<sup>7</sup> Department of Obstetrics and Gynecology, University Hospital of Schleswig Holstein, 23538 Luebeck, Germany

\* Correspondence: jan.rupp@uksh.de

† These authors contributed equally to this work.

## Supplementary material content:

Supplementary Figure S1, Supplementary Figure S2, Supplementary Table S1, Supplementary Table S2

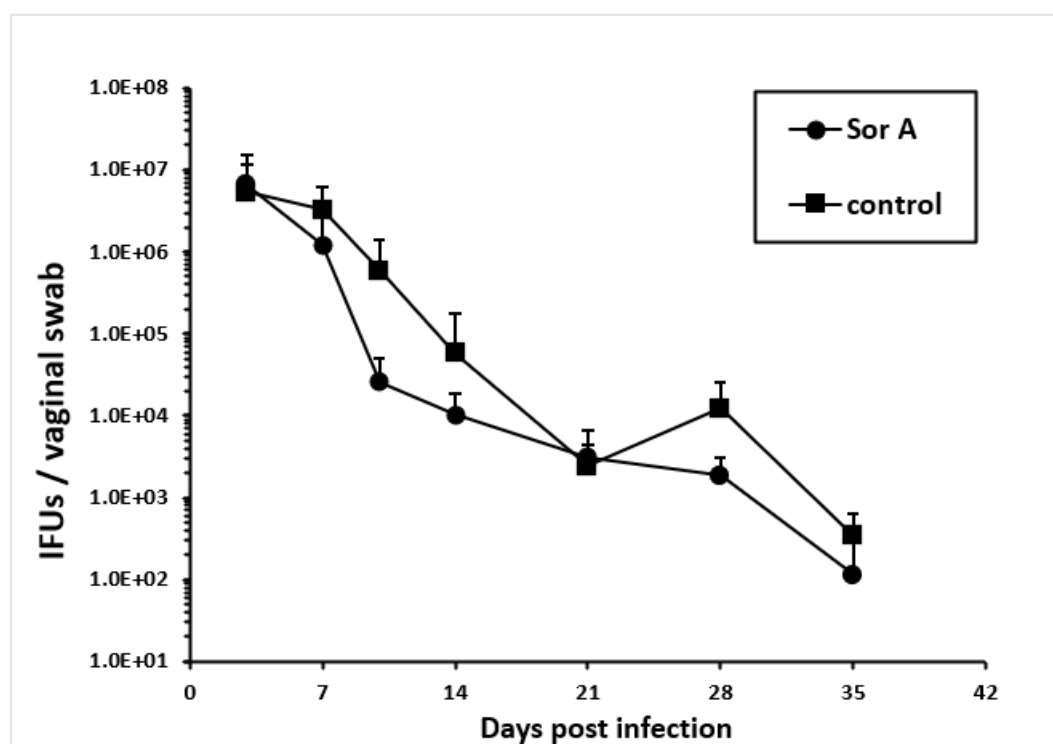

**Supplementary Figure S1.** Topical SorA treatment only slightly decreases the *C. muridarum* burden during the course of an established infection in a mouse model. Chlamydial shedding from the vagina established a peak at day 3 post infection but was reduced when SorA was applied topically from day 4 – 11. Application of SorA was performed twice daily using 5 mg/kg body weight was intravaginally applied in a volume of 21,4  $\mu$ l. (n=5 two-way ANOVA multiple comparisons and significances vs vehicle control, \*p<0.05). Red line indicating start of treatment.

A

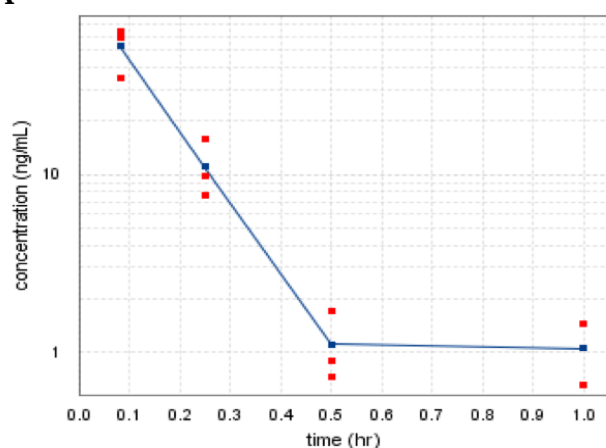

B

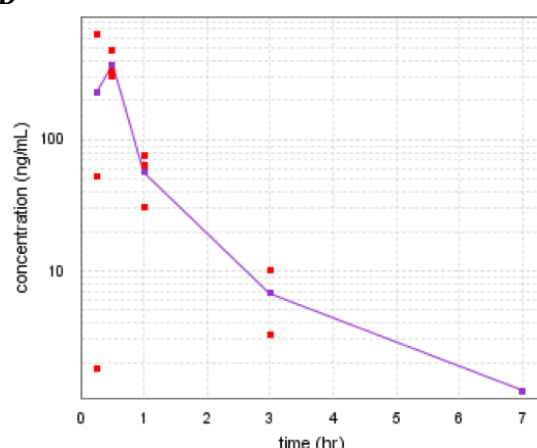

**Supplementary Figure S2.** Plasma levels after intravenous and intraperitoneal SorA application. In (A) 9.51 mg/kg Sor A was applied intravenously. One hour after intravenous application of Sor A, the average plasma concentration of the substance successively decreased from circa 14 ng/ml to around 1 ng/ml after half an hour and then to not detectable concentrations after another 30 minutes. (B) 46.3 mg/kg Sor A was injected intraperitoneally. After an initial increase of the plasma concentration, it decreased from a maximum plasma concentration of 120 ng/ml to below detection limit by 7 hours after application. hr: hours (n=3), red dots: individual measurements, blue dots/lines: mean values.

**Supplementary Table S1.** Q1 and Q3 masses for caffeine and SorA

| ID       | Q1 Mass [Da] | Q3 Mass [Da] | time [msec] | DP [volts] | CE [volts] | CXP [volts] |
|----------|--------------|--------------|-------------|------------|------------|-------------|
| SorA     | 824.441      | 789.3        | 50          | 51         | 19         | 20          |
| SorA     | 824.441      | 771.3        | 50          | 51         | 21         | 20          |
| SorA     | 824.441      | 753.3        | 50          | 51         | 25         | 20          |
| SorA     | 824.441      | 807.3        | 50          | 51         | 13         | 20          |
| caffeine | 195.024      | 138.0        | 50          | 60         | 25         | 14          |
| caffeine | 195.024      | 11.0         | 50          | 60         | 31         | 18          |

**Supplementary Table S2:** Contribution of the different models to developing sorangicin A as a new therapeutic option for the treatment of chlamydial infections.

| Item                                 | Cell culture (human) | Ex vivo fallopian tube model (human) | Systemic application (mouse) | Topical application (mouse) |
|--------------------------------------|----------------------|--------------------------------------|------------------------------|-----------------------------|
| Eradication of <i>C. trachomatis</i> | Achieved             | Achieved                             | Not achieved                 | Partially achieved          |
| Protection of vaginal microbiota     | NA                   | NA                                   | Achieved                     | Achieved                    |
| Protection of gut microbiota         | NA                   | NA                                   | Not achieved                 | Achieved                    |
